# Supplementary material for: Physiological Responses of Jurkat Lymphocytes to Simulated Microgravity Conditions
Source: MDPI journal article supplement (doi:10.3390/ijms20081892), 2019-04-17
Supplement: s1 [file s1]

**Table 1s.** Quantitative analyses of the spontaneous intracellular

| Time        | IL-2                               |                   | TNF $\alpha$                       |                      | GM-CSF                             |                       |
|-------------|------------------------------------|-------------------|------------------------------------|----------------------|------------------------------------|-----------------------|
|             | (OD <sub>450</sub> $\pm$ SEM, n=3) |                   | (OD <sub>450</sub> $\pm$ SEM, n=3) |                      | (OD <sub>450</sub> $\pm$ SEM, n=3) |                       |
|             | Ctr                                | RPM               | Ctr                                | RPM                  | Ctr                                | RPM                   |
| <b>24 h</b> | 0.174 $\pm$ 0.010                  | 0.155 $\pm$ 0.008 | 0.006 $\pm$ 0.00001                | 0.004 $\pm$ 0.000001 | 0.0005 $\pm$ 0.000009              | 0.0007 $\pm$ 0.000007 |
| <b>48 h</b> | 0.170 $\pm$ 0.010                  | 0.158 $\pm$ 0.025 | 0.004 $\pm$ 0.00001                | 0.003 $\pm$ 0.000001 | 0.0005 $\pm$ 0.000008              | 0.0006 $\pm$ 0.000008 |
| <b>72 h</b> | 0.169 $\pm$ 0.003                  | 0.148 $\pm$ 0.004 | 0.005 $\pm$ 0.00001                | 0.004 $\pm$ 0.000001 | 0.0004 $\pm$ 0.000008              | 0.0006 $\pm$ 0.000009 |
| <b>96 h</b> | 0.542 $\pm$ 0.025                  | 0.433 $\pm$ 0.020 | 0.004 $\pm$ 0.00001                | 0.003 $\pm$ 0.000001 | 0.0005 $\pm$ 0.000017              | 0.0003 $\pm$ 0.000023 |

In the table are reported the levels of interleukins expressed as the mean OD acquired at 450 nm ( $\pm$  SEM) of 3 independent experiments. The levels of the cytokines, present in the cell-conditioned growth medium, were quantified by a conventional sandwich-based enzyme-linked immunosorbent assay (ELISA) technique using a Multi-Analyte ELISArray kit (Qiagen, Milan, Italy) according to manufacturer's instructions. The very low OD values show a hardly detectable levels of these factors in the medium and a non-activation state of the cells.
